# Supplementary material for: Coordination polymers of Ag(i) with di-Schiff base and diaminoalkanes: double helix, ladder, CdSO4 and zigzag-chain networksElectronic supplementary information (ESI) available: Fractional coordinates, full list of bond lengths, angles, anisotropic displacement parameters and ORTEP drawings. See http://www.rsc.org/suppdata/ce/b4/b412903b/
Source: Royal Society of Chemistry journal article supplement (doi:10.1039/b412903b), 2004-01-01
Supplement: b412903b.doc [file b412903b.doc]

Correspondence to: Kumar Biradha

Department of Chemistry

Indian Institute of Technology

Khargapur-721302, India

Tel +91-3222-283346; Fax +91-3222-282252

E-mail: kbiradha@chem.iitkgp.ernet.in

Coordination Polymers of Ag(I) with di-Schiff base and diaminoalkanes: double helix, ladder, CdSO4 and zigzag-chain networks

# Madhushree Sarkar and Kumar Biradha*

*Department of Chemistry, Indian Institute of Technology, Kharagpur-721302, India; Fax:+91-3222-282252; Tel: +91-3222-283346;*

## *E-mail: kbiradha@chem.iitkgp.ernet.in*

### **Supporting Information**

ORTEP Drawings for **2b**, **3**, **4**, **5** and **6**

Crystallographic tables for **2b**, **3**, **4**, **5** and **6**

(22 pages)

1) ORTEP drawing for **2b** (thermal ellipsoids at 40% probability).

2) ORTEP drawing for **3** (thermal ellipsoids at 40% probability).

3) ORTEP drawing for **4** (thermal ellipsoids at 40% probability).

4) ORTEP drawing for **5** (thermal ellipsoids at 40% probability).

5) ORTEP drawing for **6** (thermal ellipsoids at 40% probability).

Table 1.1. Crystal data and structure refinement for **2b**.

Identification code **2b**

Empirical formula C16 H18 N4

Formula weight 266.34

Temperature 293(2) K

Wavelength 0.71073 Å

Crystal system Monoclinic

Space group C2/c

Unit cell dimensions a = 13.361(3) Å = 90°.

b = 11.510(2) Å = 102.89(3)°.

c = 9.3370(19) Å  = 90°.

Volume 1399.7(5) Å3

Z 4

Density (calculated) 1.264 Mg/m3

Absorption coefficient 0.078 mm-1

F(000) 568

Crystal size 0.40 x 0.20 x 0.20 mm3

Theta range for data collection 2.36 to 24.95°.

Index ranges 0<=h<=15, -12<=k<=13, -11<=l<=10

Reflections collected 1242

Independent reflections 1183 [R(int) = 0.0387]

Completeness to theta = 24.95° 96.0 %

Absorption correction None

Refinement method Full-matrix least-squares on F2

Data / restraints / parameters 1183 / 0 / 92

Goodness-of-fit on F2 1.058

Final R indices [I>2sigma(I)] R1 = 0.0557, wR2 = 0.1393

R indices (all data) R1 = 0.0900, wR2 = 0.1664

Extinction coefficient 0.0044(15)

Largest diff. peak and hole 0.179 and -0.162 e.Å-3

Table 1.2. Atomic coordinates ( x 104) and equivalent isotropic displacement parameters (Å2x 103)

for **2b**. U(eq) is defined as one third of the trace of the orthogonalized Uij tensor.

________________________________________________________________________________

x y z U(eq)

________________________________________________________________________________

N(1) 3037(2) 290(2) 2323(3) 73(1)

N(2) 4350(2) 3736(2) 611(2) 51(1)

C(1) 3637(2) 2050(2) 1402(2) 43(1)

C(2) 3048(2) 2682(2) 2163(2) 50(1)

C(3) 2475(2) 2126(2) 2993(3) 56(1)

C(4) 2488(2) 927(2) 3044(3) 63(1)

C(5) 3590(2) 856(2) 1522(3) 59(1)

C(6) 4290(2) 2635(2) 513(2) 44(1)

C(7) 4825(2) 1884(2) -397(3) 58(1)

C(8) 4997(2) 4370(2) -184(3) 58(1)

________________________________________________________________________________

Table 1.3. Bond lengths [Å] and angles [°] for **2b**.

____________________________________________________________________________________

N(1)-C(4) 1.323(3)

N(1)-C(5) 1.333(3)

N(2)-C(6) 1.271(3)

N(2)-C(8) 1.455(3)

C(1)-C(2) 1.380(3)

C(1)-C(5) 1.381(3)

C(1)-C(6) 1.492(3)

C(2)-C(3) 1.364(3)

C(3)-C(4) 1.381(4)

C(6)-C(7) 1.500(3)

C(8)-C(8)#1 1.491(5)

C(4)-N(1)-C(5) 117.0(2)

C(6)-N(2)-C(8) 119.90(19)

C(2)-C(1)-C(5) 116.2(2)

C(2)-C(1)-C(6) 121.30(19)

C(5)-C(1)-C(6) 122.51(19)

C(3)-C(2)-C(1) 120.1(2)

C(2)-C(3)-C(4) 118.9(2)

N(1)-C(4)-C(3) 122.8(2)

N(1)-C(5)-C(1) 125.0(2)

N(2)-C(6)-C(1) 116.46(19)

N(2)-C(6)-C(7) 125.7(2)

C(1)-C(6)-C(7) 117.80(19)

N(2)-C(8)-C(8)#1 110.1(2)

_____________________________________________________________________________________

Symmetry transformations used to generate equivalent atoms:

#1 -x+1,-y+1,-z

Table 1.4. Anisotropic displacement parameters (Å2x 103) for **2b**. The anisotropic

displacement factor exponent takes the form: -22[ h2 a*2U11 + ... + 2 h k a* b* U12 ]

______________________________________________________________________________

U11 U22 U33 U23 U13 U12

______________________________________________________________________________

N(1) 86(2) 38(1) 110(2) 13(1) 56(2) -3(1)

N(2) 60(1) 37(1) 65(1) 5(1) 32(1) -4(1)

C(1) 45(1) 32(1) 54(1) 3(1) 19(1) -2(1)

C(2) 62(2) 33(1) 62(2) 3(1) 29(1) 2(1)

C(3) 58(2) 51(2) 67(2) 7(1) 32(1) 5(1)

C(4) 62(2) 58(2) 78(2) 15(1) 37(1) -5(1)

C(5) 72(2) 31(1) 85(2) 1(1) 43(2) 1(1)

C(6) 49(1) 35(1) 51(1) 0(1) 20(1) -2(1)

C(7) 64(2) 49(1) 70(2) -5(1) 34(1) -2(1)

C(8) 68(2) 45(1) 72(2) 4(1) 37(1) -9(1)

______________________________________________________________________________

Table 1.5. Hydrogen coordinates ( x 104) and isotropic displacement parameters (Å2x 10 3)

for **2b**.

________________________________________________________________________________

x y z U(eq)

________________________________________________________________________________

H(2) 3042 3489 2110 60

H(3) 2082 2548 3517 67

H(4) 2094 552 3608 75

H(5) 3973 414 1005 70

H(7A) 5214 2365 -915 87

H(7B) 4324 1451 -1091 87

H(7C) 5278 1357 231 87

H(8A) 4740 4265 -1233 70

H(8B) 5691 4067 76 70

________________________________________________________________________________

Table 2.1. Crystal data and structure refinement for **3**.

Identification code **3**

Empirical formula C16 H18 Ag N5 O3

Formula weight 436.22

Temperature 293(2) K

Wavelength 0.71073 Å

Crystal system Orthorhombic

Space group Pca21

Unit cell dimensions a = 14.947(3) Å = 90°.

b = 11.761(2) Å = 90°.

c = 10.047(2) Å  = 90°.

Volume 1766.2(6) Å3

Z 4

Density (calculated) 1.641 Mg/m3

Absorption coefficient 1.167 mm-1

F(000) 880

Crystal size 0.15 x 0.10 x 0.10 mm3

Theta range for data collection 1.73 to 24.97°.

Index ranges 0<=h<=17, -13<=k<=13, -11<=l<=11

Reflections collected 4633

Independent reflections 3007 [R(int) = 0.4170]

Completeness to theta = 24.97° 99.7 %

Absorption correction None

Refinement method Full-matrix least-squares on F2

Data / restraints / parameters 3007 / 1 / 238

Goodness-of-fit on F2 1.095

Final R indices [I>2sigma(I)] R1 = 0.0707, wR2 = 0.1437

R indices (all data) R1 = 0.1462, wR2 = 0.1860

Absolute structure parameter 0.0(3)

Extinction coefficient 0.0003(11)

Largest diff. peak and hole 0.413 and -0.660 e.Å-3

Table 2.2. Atomic coordinates ( x 104) and equivalent isotropic displacement parameters (Å2x 103)

for **3**. U(eq) is defined as one third of the trace of the orthogonalized Uij tensor.

________________________________________________________________________________

x y z U(eq)

________________________________________________________________________________

Ag(1) 6764(1) 7776(1) 2608(2) 65(1)

Ag(2) 6755(5) 6833(11) 2620(20) 55(4)

N(1) 5490(7) 8635(10) 1601(11) 67(3)

N(2) 5499(6) 6749(11) 3585(11) 72(3)

C(1) 4683(8) 8276(15) 2341(15) 82(4)

C(2) 4703(7) 7082(12) 2720(30) 83(4)

N(11) 7464(7) 9169(11) -1288(11) 71(3)

C(11) 7758(10) 10226(13) -1305(17) 84(4)

C(12) 7361(11) 11133(16) -687(16) 91(4)

C(13) 6621(11) 10903(13) 86(16) 85(4)

C(14) 6323(9) 9816(11) 109(13) 65(3)

C(15) 6736(7) 8923(13) -548(12) 67(3)

C(16) 5461(9) 9493(13) 934(12) 71(3)

C(17) 4680(12) 10262(17) 770(20) 119(6)

N(21) 7473(9) 6369(9) 6540(12) 77(3)

C(21) 7692(9) 5328(12) 6656(12) 65(3)

C(22) 7344(11) 4428(14) 6082(17) 88(4)

C(23) 6574(12) 4588(14) 5268(17) 90(5)

C(24) 6261(8) 5670(13) 5161(13) 71(3)

C(25) 6723(7) 6561(10) 5788(12) 56(3)

C(26) 5470(9) 5949(12) 4357(14) 71(4)

C(27) 4672(11) 5134(16) 4517(19) 115(6)

O(102) 4890(30) 2780(30) -7720(50) 370(30)

O(101) 5428(17) 2140(20) -6140(40) 266(17)

N(100) 5479(12) 2623(15) -7170(30) 118(8)

O(100) 6150(20) 2852(16) -7520(40) 247(15)

________________________________________________________________________________

Table 2.3. Bond lengths [Å] and angles [°] for **3**.

_____________________________________________________

Ag(1)-N(21)#1 2.278(12)

Ag(1)-N(11)#2 2.291(12)

Ag(1)-N(1) 2.381(11)

Ag(1)-N(2) 2.449(11)

Ag(2)-N(21)#1 1.68(2)

Ag(2)-N(2) 2.114(15)

Ag(2)-C(21)#1 2.18(2)

N(1)-C(16) 1.212(16)

N(1)-C(1) 1.479(17)

N(2)-C(26) 1.220(16)

N(2)-C(2) 1.53(2)

C(1)-C(2) 1.455(19)

N(11)-C(11) 1.319(17)

N(11)-C(15) 1.349(16)

N(11)-Ag(1)#1 2.291(12)

C(11)-C(12) 1.37(2)

C(12)-C(13) 1.38(2)

C(13)-C(14) 1.354(19)

C(14)-C(15) 1.385(17)

C(14)-C(16) 1.58(2)

C(16)-C(17) 1.486(19)

N(21)-C(21) 1.272(16)

N(21)-C(25) 1.371(16)

N(21)-Ag(2)#2 1.68(2)

N(21)-Ag(1)#2 2.278(12)

C(21)-C(22) 1.31(2)

C(21)-Ag(2)#2 2.18(2)

C(22)-C(23) 1.42(2)

C(23)-C(24) 1.36(2)

C(24)-C(25) 1.404(17)

C(24)-C(26) 1.470(19)

C(26)-C(27) 1.538(18)

O(102)-N(100) 1.06(3)

O(101)-N(100) 1.18(3)

N(100)-O(100) 1.09(2)

N(21)#1-Ag(1)-N(11)#2 119.7(4)

N(21)#1-Ag(1)-N(1) 120.6(5)

N(11)#2-Ag(1)-N(1) 107.8(4)

N(21)#1-Ag(1)-N(2) 102.5(4)

N(11)#2-Ag(1)-N(2) 123.2(4)

N(1)-Ag(1)-N(2) 76.3(4)

N(21)#1-Ag(2)-N(2) 153.2(10)

N(21)#1-Ag(2)-C(21)#1 35.5(6)

N(2)-Ag(2)-C(21)#1 120.2(8)

C(16)-N(1)-C(1) 119.0(12)

C(16)-N(1)-Ag(1) 128.1(10)

C(1)-N(1)-Ag(1) 108.5(8)

C(26)-N(2)-C(2) 122.2(12)

C(26)-N(2)-Ag(2) 111.0(11)

C(2)-N(2)-Ag(2) 114.7(13)

C(26)-N(2)-Ag(1) 131.5(10)

C(2)-N(2)-Ag(1) 104.2(9)

Ag(2)-N(2)-Ag(1) 26.9(4)

C(2)-C(1)-N(1) 112.9(12)

C(1)-C(2)-N(2) 114.4(12)

C(11)-N(11)-C(15) 118.6(12)

C(11)-N(11)-Ag(1)#1 120.0(9)

C(15)-N(11)-Ag(1)#1 121.3(10)

N(11)-C(11)-C(12) 125.7(14)

C(11)-C(12)-C(13) 116.8(16)

C(14)-C(13)-C(12) 117.3(14)

C(13)-C(14)-C(15) 124.1(14)

C(13)-C(14)-C(16) 120.3(12)

C(15)-C(14)-C(16) 115.6(12)

N(11)-C(15)-C(14) 117.3(14)

N(1)-C(16)-C(17) 126.7(14)

N(1)-C(16)-C(14) 117.4(11)

C(17)-C(16)-C(14) 115.9(12)

C(21)-N(21)-C(25) 114.8(11)

C(21)-N(21)-Ag(2)#2 94.4(11)

C(25)-N(21)-Ag(2)#2 150.1(11)

C(21)-N(21)-Ag(1)#2 121.8(10)

C(25)-N(21)-Ag(1)#2 123.3(8)

Ag(2)#2-N(21)-Ag(1)#2 27.6(5)

N(21)-C(21)-C(22) 129.4(14)

N(21)-C(21)-Ag(2)#2 50.0(8)

C(22)-C(21)-Ag(2)#2 179.0(12)

C(21)-C(22)-C(23) 117.7(15)

C(24)-C(23)-C(22) 116.5(15)

C(23)-C(24)-C(25) 119.6(13)

C(23)-C(24)-C(26) 122.0(14)

C(25)-C(24)-C(26) 118.4(13)

N(21)-C(25)-C(24) 121.8(11)

N(2)-C(26)-C(24) 119.5(13)

N(2)-C(26)-C(27) 125.1(14)

C(24)-C(26)-C(27) 115.3(12)

O(102)-N(100)-O(100) 123(5)

O(102)-N(100)-O(101) 119(4)

O(100)-N(100)-O(101) 118(3)

_____________________________________________________________

Symmetry transformations used to generate equivalent atoms:

#1 -x+3/2,y,z-1/2 #2 -x+3/2,y,z+1/2

Table 2.4. Anisotropic displacement parameters (Å2x 103) for **3**. The anisotropic

displacement factor exponent takes the form: -22[ h2 a*2U11 + ... + 2 h k a* b* U12 ]

______________________________________________________________________________

U11 U22 U33 U23 U13 U12

______________________________________________________________________________

Ag(1) 47(1) 78(1) 69(1) -4(1) -1(1) -1(1)

Ag(2) 38(4) 99(10) 28(4) -6(11) 7(5) -7(4)

N(1) 50(5) 87(8) 63(6) 8(5) 5(5) 13(5)

N(2) 43(5) 121(9) 51(5) -2(6) 6(4) -3(6)

C(1) 47(6) 122(10) 76(12) 2(9) -1(7) 3(7)

C(2) 37(5) 118(11) 94(10) 27(13) 3(10) -12(6)

N(11) 51(6) 105(9) 59(7) -1(6) 9(5) 10(6)

C(11) 55(8) 83(10) 113(12) 14(8) 2(8) -10(7)

C(12) 77(10) 107(12) 90(10) 8(8) 1(9) 13(10)

C(13) 80(10) 86(10) 89(10) -13(8) -3(8) 15(8)

C(14) 71(8) 79(8) 45(6) 2(6) -15(6) 24(7)

C(15) 46(6) 98(9) 57(7) -12(6) -2(6) 18(6)

C(16) 66(7) 101(10) 46(7) -6(7) 0(6) 19(8)

C(17) 82(11) 149(17) 127(15) 38(12) 5(11) 29(12)

N(21) 88(8) 63(7) 81(7) -8(5) 2(7) -6(6)

C(21) 66(8) 88(10) 40(6) -9(6) -4(6) -17(7)

C(22) 80(10) 83(9) 101(12) 8(8) 23(10) 11(8)

C(23) 91(11) 88(10) 90(12) -1(8) 2(9) -17(9)

C(24) 45(6) 112(11) 56(8) 0(7) 10(5) -12(7)

C(25) 47(6) 61(6) 62(7) -6(5) 5(6) 8(5)

C(26) 63(8) 86(10) 63(8) 15(7) 9(7) -6(7)

C(27) 91(11) 132(14) 122(14) 30(11) -22(11) -68(11)

O(102) 300(40) 430(40) 380(50) -70(30) -270(40) 150(30)

O(101) 141(18) 280(30) 380(40) 180(30) 50(20) 17(18)

N(100) 91(10) 122(11) 140(20) 2(12) -38(16) -11(9)

O(100) 300(30) 190(15) 260(30) 10(20) 200(30) -45(19)

______________________________________________________________________________

Table 2.5. Hydrogen coordinates ( x 104) and isotropic displacement parameters (Å2x 10 3)

For **3**.

________________________________________________________________________________

x y z U(eq)

________________________________________________________________________________

H(1A) 4628 8736 3138 98

H(1B) 4160 8415 1794 98

H(2A) 4714 6625 1914 99

H(2B) 4156 6904 3192 99

H(11) 8282 10367 -1777 100

H(12) 7580 11869 -784 109

H(13) 6337 11472 571 102

H(15) 6520 8184 -482 80

H(17A) 4209 10029 1358 179

H(17B) 4472 10225 -135 179

H(17C) 4854 11027 974 179

H(21) 8167 5184 7230 78

H(22) 7593 3711 6202 106

H(23) 6299 3984 4832 107

H(25) 6514 7301 5691 68

H(27A) 4178 5404 3996 172

H(27B) 4500 5100 5437 172

H(27C) 4841 4388 4219 172

________________________________________________________________________________

Table 3.1. Crystal data and structure refinement for **4**.

Identification code **4**

Empirical formula C2 H8 Ag N3 O3

Formula weight 229.98

Temperature 293(2) K

Wavelength 0.71073 Å

Crystal system Monoclinic

Space group C2/c

Unit cell dimensions a = 10.418(2) Å = 90°.

b = 10.521(2) Å = 115.16(3)°.

c = 6.2870(13) Å  = 90°.

Volume 623.7(2) Å3

Z 4

Density (calculated) 2.449 Mg/m3

Absorption coefficient 3.171 mm-1

F(000) 448

Crystal size 0.40 x 0.20 x 0.20 mm3

Theta range for data collection 2.90 to 24.94°.

Index ranges 0<=h<=12, -12<=k<=12, -7<=l<=6

Reflections collected 1122

Independent reflections 549 [R(int) = 0.0422]

Completeness to theta = 24.94° 100.0 %

Absorption correction None

Refinement method Full-matrix least-squares on F2

Data / restraints / parameters 549 / 0 / 48

Goodness-of-fit on F2 1.320

Final R indices [I>2sigma(I)] R1 = 0.0480, wR2 = 0.1462

R indices (all data) R1 = 0.0511, wR2 = 0.1559

Largest diff. peak and hole 1.716 and -2.486 e.Å-3

Table 3.2. Atomic coordinates ( x 104) and equivalent isotropic displacement parameters (Å2x 103)

for **4**. U(eq) is defined as one third of the trace of the orthogonalized Uij tensor.

________________________________________________________________________________

x y z U(eq)

________________________________________________________________________________

Ag(1) 5000 0 5000 30(1)

N(1) 3127(4) 1098(4) 3816(7) 36(1)

C(1) 3165(4) 2106(4) 5464(7) 29(1)

O(101) 1105(6) 1636(8) 8595(8) 108(3)

O(102) 0 -72(8) 7500 87(6)

N(100) 0 1081(7) 7500 43(2)

________________________________________________________________________________

Table 3.3. Bond lengths [Å] and angles [°] for **4**.

_____________________________________________________

Ag(1)-N(1)#1 2.112(4)

Ag(1)-N(1) 2.112(4)

Ag(1)-Ag(1)#2 3.1435(6)

Ag(1)-Ag(1)#3 3.1435(6)

N(1)-C(1) 1.472(5)

C(1)-C(1)#4 1.503(8)

O(101)-N(100) 1.211(6)

O(102)-N(100) 1.214(8)

N(100)-O(101)#5 1.211(6)

N(1)#1-Ag(1)-N(1) 180.0

N(1)#1-Ag(1)-Ag(1)#2 87.68(11)

N(1)-Ag(1)-Ag(1)#2 92.32(11)

N(1)#1-Ag(1)-Ag(1)#3 92.32(11)

N(1)-Ag(1)-Ag(1)#3 87.68(11)

Ag(1)#2-Ag(1)-Ag(1)#3 180.0

C(1)-N(1)-Ag(1) 113.7(3)

N(1)-C(1)-C(1)#4 112.3(4)

O(101)-N(100)-O(101)#5 122.3(11)

O(101)-N(100)-O(102) 118.8(5)

O(101)#5-N(100)-O(102) 118.8(5)

_____________________________________________________________

Symmetry transformations used to generate equivalent atoms:

#1 -x+1,-y,-z+1 #2 -x+1,y,-z+1/2 #3 -x+1,y,-z+3/2

#4 -x+1/2,-y+1/2,-z+1 #5 -x,y,-z+3/2

Table 3.4. Anisotropic displacement parameters (Å2x 103) for **4**. The anisotropic

displacement factor exponent takes the form: -22[ h2 a*2U11 + ... + 2 h k a* b* U12 ]

______________________________________________________________________________

U11 U22 U33 U23 U13 U12

______________________________________________________________________________

Ag(1) 26(1) 35(1) 26(1) -4(1) 7(1) 10(1)

N(1) 30(2) 39(2) 33(2) -7(2) 7(2) 10(2)

C(1) 24(2) 38(2) 18(2) 1(2) 2(2) 8(2)

O(101) 77(4) 172(7) 44(2) 28(4) -3(3) -71(4)

O(102) 110(18) 71(11) 102(15) 0 65(14) 0

N(100) 37(3) 56(4) 33(3) 0 13(3) 0

______________________________________________________________________________

Table 3.5. Hydrogen coordinates ( x 104) and isotropic displacement parameters (Å2x 10 3)

for **4**.

________________________________________________________________________________

x y z U(eq)

________________________________________________________________________________

H(1) 3076 1692 2643 70(20)

H(2) 2265 543 3347 59(17)

H(1A) 3971 2654 5759 32(15)

H(1B) 3294 1725 6947 38(13)

________________________________________________________________________________

.Table 4.1. Crystal data and structure refinement for **5**.

Identification code **5**

Empirical formula C3 H11 Ag N3 O3.50

Formula weight 253.02

Temperature 293(2) K

Wavelength 0.71073 Å

Crystal system Monoclinic

Space group P2/c

Unit cell dimensions a = 8.1010(16) Å = 90°.

b = 8.3910(17) Å = 106.88(3)°.

c = 11.034(2) Å  = 90°.

Volume 717.7(2) Å3

Z 4

Density (calculated) 2.342 Mg/m3

Absorption coefficient 2.772 mm-1

F(000) 500

Crystal size 0.40 x 0.20 x 0.20 mm3

Theta range for data collection 2.43 to 24.97°.

Index ranges 0<=h<=9, 0<=k<=9, -13<=l<=12

Reflections collected 1296

Independent reflections 1206 [R(int) = 0.0777]

Completeness to theta = 24.97° 96.0 %

Absorption correction None

Refinement method Full-matrix least-squares on F2

Data / restraints / parameters 1206 / 0 / 97

Goodness-of-fit on F2 1.052

Final R indices [I>2sigma(I)] R1 = 0.0551, wR2 = 0.1338

R indices (all data) R1 = 0.0921, wR2 = 0.1630

Largest diff. peak and hole 1.982 and -1.234 e.Å-3

Table 4.2. Atomic coordinates ( x 104) and equivalent isotropic displacement parameters (Å2x 103)

for **5**. U(eq) is defined as one third of the trace of the orthogonalized Uij tensor.

________________________________________________________________________________

x y z U(eq)

________________________________________________________________________________

O(1) -10000 9580(50) -2500 235(19)

Ag(1) -10000 3040(1) -2500 41(1)

Ag(2) -10000 6664(2) -2500 47(1)

N(100) -3679(15) 3353(13) -578(9) 49(3)

O(101) -2138(13) 3684(13) -452(12) 76(3)

O(102) -4758(18) 4340(20) -1136(18) 139(6)

O(103) -4169(17) 2151(13) -172(11) 76(3)

N(1) -11818(14) 3012(11) -4319(8) 46(2)

N(2) -12496(14) 3194(11) -7192(10) 47(2)

C(1) -11577(15) 1690(12) -5176(11) 39(3)

C(2) -12810(16) 1762(14) -6497(11) 43(3)

C(3) -12563(16) 297(14) -7222(10) 46(3)

________________________________________________________________________________

Table 4.3. Bond lengths [Å] and angles [°] for **5**.

__________________________________________________________________________________

O(1)-Ag(2) 2.45(4)

Ag(1)-N(1)#1 2.117(9)

Ag(1)-N(1) 2.117(9)

Ag(1)-Ag(2) 3.041(2)

Ag(2)-N(2)#2 2.149(11)

Ag(2)-N(2)#3 2.149(11)

N(100)-O(103) 1.216(13)

N(100)-O(102) 1.230(16)

N(100)-O(101) 1.247(14)

N(1)-C(1) 1.506(14)

N(2)-C(2) 1.487(14)

N(2)-Ag(2)#3 2.149(11)

C(1)-C(2) 1.511(17)

C(2)-C(3) 1.511(16)

N(1)#1-Ag(1)-N(1) 178.7(5)

N(1)#1-Ag(1)-Ag(2) 90.6(3)

N(1)-Ag(1)-Ag(2) 90.6(3)

N(2)#2-Ag(2)-N(2)#3 173.6(5)

N(2)#2-Ag(2)-O(1) 86.8(2)

N(2)#3-Ag(2)-O(1) 86.8(2)

N(2)#2-Ag(2)-Ag(1) 93.2(2)

N(2)#3-Ag(2)-Ag(1) 93.2(2)

O(1)-Ag(2)-Ag(1) 180.000(2)

O(103)-N(100)-O(102) 118.7(14)

O(103)-N(100)-O(101) 124.6(13)

O(102)-N(100)-O(101) 116.7(12)

C(1)-N(1)-Ag(1) 114.9(7)

C(2)-N(2)-Ag(2)#3 115.9(8)

N(1)-C(1)-C(2) 113.9(9)

N(2)-C(2)-C(1) 111.5(9)

N(2)-C(2)-C(3) 108.4(10)

C(1)-C(2)-C(3) 109.0(10)

____________________________________________________________________________________

Symmetry transformations used to generate equivalent atoms:

#1 -x-2,y,-z-1/2 #2 x,-y+1,z+1/2 #3 -x-2,-y+1,-z-1

Table 4.4. Anisotropic displacement parameters (Å2x 103) for **5**. The anisotropic

displacement factor exponent takes the form: -22[ h2 a*2U11 + ... + 2 h k a* b* U12 ]

______________________________________________________________________________

U11 U22 U33 U23 U13 U12

______________________________________________________________________________

O(1) 190(30) 250(40) 310(60) 0 140(40) 0

Ag(1) 53(1) 36(1) 26(1) 0 1(1) 0

Ag(2) 62(1) 39(1) 48(1) 0 27(1) 0

N(100) 62(7) 51(6) 32(5) 8(4) 10(5) -12(6)

O(101) 49(6) 63(6) 119(10) -8(6) 30(6) 0(5)

O(102) 79(9) 148(14) 175(16) 66(13) 15(10) 20(10)

O(103) 108(9) 67(7) 66(7) 6(5) 45(6) -17(6)

N(1) 66(7) 47(6) 20(4) -1(4) 5(4) 8(5)

N(2) 57(6) 40(6) 44(6) -3(4) 15(5) -2(5)

C(1) 47(7) 33(6) 35(6) -3(5) 10(5) -7(5)

C(2) 45(7) 53(7) 37(6) 2(5) 19(5) -18(6)

C(3) 52(7) 61(8) 32(5) -10(5) 22(5) -15(6)

______________________________________________________________________________

Table 4.5. Hydrogen coordinates ( x 104) and isotropic displacement parameters (Å2x 10 3)

for **5**.

________________________________________________________________________________

x y z U(eq)

________________________________________________________________________________

H(11N) -11733 4012 -4754 50

H(12N) -12631 3173 -3954 50

H(21N) -12912 3179 -7925 50

H(22N) -12390 4208 -6738 50

H(1A) -11722 676 -4797 46

H(1B) -10405 1732 -5232 46

H(2) -13998 1787 -6446 52

H(3A) -13339 339 -8064 69

H(3B) -12798 -639 -6799 69

H(3C) -11396 262 -7262 69

________________________________________________________________________________

Table 5.1. Crystal data and structure refinement for **6**.

Identification code **6**

Empirical formula C3 H10 Ag N3 O3

Formula weight 244.01

Temperature 293(2) K

Wavelength 0.71073 Å

Crystal system Orthorhombic

Space group Pnma

Unit cell dimensions a = 9.4230(19) Å = 90°.

b = 10.410(2) Å = 90°.

c = 7.6430(15) Å  = 90°.

Volume 749.7(3) Å3

Z 4

Density (calculated) 2.162 Mg/m3

Absorption coefficient 2.645 mm-1

F(000) 480

Crystal size 0.30 x 0.20 x 0.20 mm3

Theta range for data collection 3.31 to 25.00°.

Index ranges 0<=h<=11, -12<=k<=12, 0<=l<=9

Reflections collected 1287

Independent reflections 684 [R(int) = 0.0437]

Completeness to theta = 25.00° 98.0 %

Absorption correction None

Refinement method Full-matrix least-squares on F2

Data / restraints / parameters 684 / 0 / 52

Goodness-of-fit on F2 0.759

Final R indices [I>2sigma(I)] R1 = 0.0277, wR2 = 0.0759

R indices (all data) R1 = 0.0409, wR2 = 0.0924

Largest diff. peak and hole 0.444 and -0.399 e.Å-3

Table 5.2. Atomic coordinates ( x 104) and equivalent isotropic displacement parameters (Å2x 103)

for **6**. U(eq) is defined as one third of the trace of the orthogonalized Uij tensor.

________________________________________________________________________________

x y z U(eq)

________________________________________________________________________________

Ag(1) 5000 0 5000 53(1)

N(3) 3955(7) 2500 8650(7) 59(1)

N(4) 3495(4) 145(3) 2951(5) 52(1)

C(5) 3445(6) 2500 3196(8) 42(1)

C(6) 2577(4) 1287(4) 2988(6) 50(1)

O(1) 2887(10) 2500 7746(12) 135(3)

O(2) 4388(5) 1451(3) 9162(6) 85(1)

________________________________________________________________________________

Table 5.3. Bond lengths [Å] and angles [°] for **6**.

_____________________________________________________

Ag(1)-N(4)#1 2.118(4)

Ag(1)-N(4) 2.118(4)

O(2)-N(3) 1.229(4)

N(3)-O(1) 1.222(9)

N(3)-O(2)#2 1.229(4)

N(4)-C(6) 1.471(5)

C(5)-C(6) 1.513(5)

C(5)-C(6)#2 1.513(5)

N(4)#1-Ag(1)-N(4) 180.0

O(1)-N(3)-O(2)#2 117.0(3)

O(1)-N(3)-O(2) 117.0(3)

O(2)#2-N(3)-O(2) 125.3(7)

C(6)-N(4)-Ag(1) 115.9(3)

C(6)-C(5)-C(6)#2 113.1(4)

N(4)-C(6)-C(5) 111.0(3)

_____________________________________________________________

Symmetry transformations used to generate equivalent atoms:

#1 -x+1,-y,-z+1 #2 x,-y+1/2,z

Table 5.4. Anisotropic displacement parameters (Å2x 103) for **6**. The anisotropic

displacement factor exponent takes the form: -22[ h2 a*2U11 + ... + 2 h k a* b* U12 ]

______________________________________________________________________________

U11 U22 U33 U23 U13 U12

______________________________________________________________________________

Ag(1) 48(1) 39(1) 73(1) 13(1) 0(1) 0(1)

N(3) 73(4) 45(3) 58(3) 0 0(3) 0

N(4) 61(2) 32(2) 63(2) -3(1) 1(2) -7(2)

C(5) 42(3) 30(2) 55(3) 0 -4(3) 0

C(6) 46(2) 39(2) 64(2) 2(2) -8(2) -5(2)

O(1) 160(6) 58(3) 186(8) 0 -87(7) 0

O(2) 95(3) 58(2) 101(3) 3(2) 1(3) 21(2)

______________________________________________________________________________

Table 5.5. Hydrogen coordinates ( x 104) and isotropic displacement parameters (Å2x 10 3)

for **6**.

________________________________________________________________________________

x y z U(eq)

________________________________________________________________________________

H(4A) 2924 -617 3012 62

H(4B) 4026 145 1879 62

H(5A) 3894 2500 4323 51

H(5B) 4157 2500 2298 51

H(6A) 2034 1337 1927 60

H(6B) 1945 1222 3970 60

________________________________________________________________________________
